# Supplementary material for: Examining the Early Distribution of the Artemisinin-Resistant Plasmodium falciparum kelch13 R561H Mutation in Areas of Higher Transmission in Rwanda
Source: PubMed Central journal article supplement — Open Forum Infect Dis. 2023 Mar 21;10(4):ofad149. doi: 10.1093/ofid/ofad149 (PMC10122489; doi:10.1093/ofid/ofad149), 2023-03-21
Supplement: ofad149_supplementary_data.pdf [file ofad149_supplementary_data.pdf]

## Supplementary Materials

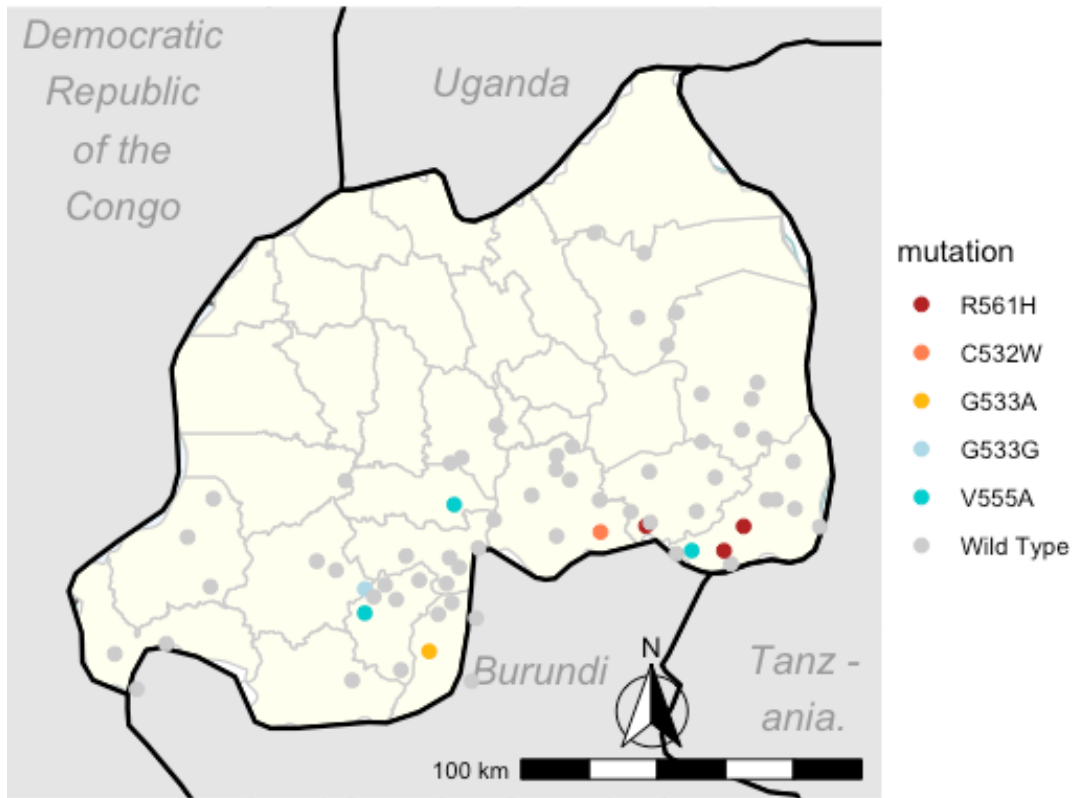

**Supplementary Figure 1:** Cluster level mutation presence. Colored dot indicates presence of mutation in a cluster, not prevalence.

## Supplementary Table 1: *Pfk13* haplotypes observed in sequenced samples (N=351)

**Supplementary Table 1:** *Pfk13* haplotypes observed in sequenced samples (N=351)

| Mutation  | Amino Acid Sequence                                               | Codon Change at Mutation Site | N Samples | Percent of Population (Weighted) |
|-----------|-------------------------------------------------------------------|-------------------------------|-----------|----------------------------------|
| Wild Type | 516-DVWYVSSNLNIPRRNCGVTSNGRIYCIIGGYDGSSIIPNVEAYDHRMKAWVEVAPLN-572 | NA                            | 341       | 97.03%                           |
| C532W     | 516-DVWYVSSNLNIPRRNCGVTSNGRIYCIIGGYDGSSIIPNVEAYDHRMKAWVEVAPLN-572 | TGT -> GGT                    | 1         | 0.28%                            |
| G533A     | 516-DVWYVSSNLNIPRRNCGVTSNGRIYCIIGGYDGSSIIPNVEAYDHRMKAWVEVAPLN-572 | GGT -> GCT                    | 1         | 0.27%                            |
| G533G     | 516-DVWYVSSNLNIPRRNCGVTSNGRIYCIIGGYDGSSIIPNVEAYDHRMKAWVEVAPLN-572 | GGT -> GGA                    | 1         | 0.30%                            |
| V555A     | 516-DVWYVSSNLNIPRRNCGVTSNGRIYCIIGGYDGSSIIPNVEAYDHRMKAWVEVAPLN-572 | GTA -> GCA                    | 3         | 0.78%                            |
| R561H     | 516-DVWYVSSNLNIPRRNCGVTSNGRIYCIIGGYDGSSIIPNVEAYDHRMKAWVEVAPLN-572 | CGT -> CAT                    | 4         | 1.34%                            |

**Supplementary Table 2: Survey weighted Pfk13 Mutation Prevalence Within Administrative Districts**

| <b>District</b>   | <b>C532W</b> | <b>G533A</b> | <b>G533G</b> | <b>V555A</b> | <b>R561H</b> | <b>Wild Type</b> | <b>N Samples</b> |
|-------------------|--------------|--------------|--------------|--------------|--------------|------------------|------------------|
| <b>Bugesera</b>   | 1 (2.14%)    | 0            | 0            | 0            | 0            | 47               | 48               |
| <b>Gatsibo</b>    | 0            | 0            | 0            | 0            | 0            | 11               | 11               |
| <b>Gisagara</b>   | 0            | 0            | 0            | 0            | 0            | 27               | 27               |
| <b>Huye</b>       | 0            | 0            | 0            | 1 (3.01%)    | 0            | 32               | 33               |
| <b>Kamonyi</b>    | 0            | 0            | 0            | 0            | 0            | 3                | 3                |
| <b>Karongi</b>    | 0            | 0            | 0            | 0            | 0            | 4                | 4                |
| <b>Kayonza</b>    | 0            | 0            | 0            | 0            | 0            | 23               | 23               |
| <b>Kirehe</b>     | 0            | 0            | 0            | 1 (1.78%)    | 3 (5.47%)    | 50               | 54               |
| <b>Ngoma</b>      | 0            | 1 (1.63%)    | 0            | 0            | 1 (2.74%)    | 50               | 52               |
| <b>Nyamagabe</b>  | 0            | 0            | 1 (5.37%)    | 0            | 0            | 19               | 20               |
| <b>Nyamasheke</b> | 0            | 0            | 0            | 0            | 0            | 3                | 3                |
| <b>Nyanza</b>     | 0            | 0            | 0            | 1 (1.93%)    | 0            | 44               | 45               |
| <b>Nyaruguru</b>  | 0            | 0            | 0            | 0            | 0            | 9                | 9                |
| <b>Ruhango</b>    | 0            | 0            | 0            | 0            | 0            | 12               | 12               |
| <b>Rusizi</b>     | 0            | 0            | 0            | 0            | 0            | 7                | 7                |
| <b>Total</b>      | 1            | 1            | 1            | 3            | 4            | 341              | 351              |

**Supplementary table 3: previous sources for *Pfk13* mutation information**

| <b>Mutation</b> | <b>In vitro artemisinin resistance status</b> | <b>Date First Observed, Location (Percent), Study</b> | <b>Other Observations in Rwanda: Date, Location (Percent), Study</b>                                                                                                                                                                                      | <b>Notes</b>                                                                                                    |
|-----------------|-----------------------------------------------|-------------------------------------------------------|-----------------------------------------------------------------------------------------------------------------------------------------------------------------------------------------------------------------------------------------------------------|-----------------------------------------------------------------------------------------------------------------|
| C532W           | Unvalidated                                   | 2014-15, Bugesera (2.14%), <b>this study</b>          | none                                                                                                                                                                                                                                                      |                                                                                                                 |
| G533A           | Unvalidated                                   | 2014-15, Ngoma (1.63%), <b>this study</b>             | <ul style="list-style-type: none"> <li>• 2019, Huye District (1.5%), Bergmann et al 2021</li> </ul>                                                                                                                                                       | Associated with treatment failure in India, but cannot be directly linked to ACT resistance (Mishra et al 2015) |
| G533G           | Unvalidated                                   | 2014-15, Nyamagabe (5.37%), <b>this study</b>         | none                                                                                                                                                                                                                                                      |                                                                                                                 |
| R561H           | Validated                                     | 2014-15, Masaka (7.4%), Uwimana et al 2020            | <ul style="list-style-type: none"> <li>• 2014-15, Kirehe (5.47%), Ngoma (2.47%), <b>this study</b></li> <li>• 2018, Masaka (19.6%), Rukara (22%), Uwimana et al 2021</li> <li>• 2019, Huye District (4.5%), Bergmann et al 2021</li> </ul>                |                                                                                                                 |
| V555A           | Unvalidated                                   | 2012, Huye District (1.2%), Tacoli et al 2015         | <ul style="list-style-type: none"> <li>• 2014-15, Huye (3.01%), Kirehe (1.78%), Nyanza (1.93%), <b>this study</b></li> <li>• 2015, Masaka (0.39%), Rukara (1.2%), Uwimana et al 2020</li> <li>• 2019 Huye District (1.5%), Bergmann et al 2021</li> </ul> |                                                                                                                 |

## Supplementary Methods

### PCR Protocol

#### PCR step 1

- Primers were manufactured by IDT and hydrated to 100 uM stock solutions in Low EDTA TE (Thermo #AAJ75793AP), then diluted to 10 uM in molecular grade water (MGW).
- DNA was centrifuged at 4000 rpm for 3 minutes before 2.5uL was transferred from the top of the tube to the reaction mixture to reduce chelex carryover.
- Non-template negative control and 3D7 positive controls were added to each plate.

#### PCR step 2

- 5uL of PCR product from PCR1 diluted 1:10 with molecular grade water were added immediately after dilution.

#### Overall

- Thermocycling was run on an Eppendorf Mastercycler 96
- PCR step 1 primers contained linkers and PCR step 2 primers contained unique barcodes to allow for multiplexing.

#### PCR Step 1 Master Mix

| Reagents                     | Stock Concentration | Volume 1x reaction |
|------------------------------|---------------------|--------------------|
| (NEB #M0491, Thermo BP28191) |                     |                    |
| Molecular Grade Water        | NA                  | 11.75 uL           |
| Q5 Reaction Buffer           | 5x                  | 5 uL               |
| dNTPs                        | 10 mM               | 0.5 uL             |
| Primer F                     | 10 uM               | 2 uL               |
| Primer R                     | 10 uM               | 0.5 uL             |

|                      |           |                |
|----------------------|-----------|----------------|
| <b>Q5 Polymerase</b> | 2000 U/mL | 0.25 uL        |
| <b>MgCl</b>          | 50 mM     | 3 uL           |
| <b>Total</b>         |           | <b>22.5 uL</b> |
|                      |           | +2.5 uL DNA    |

### Primer Design

|                |                                                     |
|----------------|-----------------------------------------------------|
| Forward Primer | 5'-GACTCGCCAAGCTGAAGNNNNCATAGCTGATGATCTAGGGG-3'     |
| Reverse Primer | 5'-ACGTGTGCTCTTCCGATCTNNNNCTGAGGTGTATGATCGTTTAAG-3' |

### PCR Step 1 Thermocycling Parameters

| Cycle Step           |              | Temperature (C) | Time       | No. Cycles |
|----------------------|--------------|-----------------|------------|------------|
| Initial Denaturation |              | 98              | 30 seconds | 1x         |
| Amplification        | Denaturation | 95              | 10 seconds | 30x        |
|                      | Annealing    | 56              | 15 seconds |            |
|                      | Elongation   | 72              | 20 seconds |            |
| Final Elongation     |              | 72              | 2 minutes  | 1x         |
| Hold                 |              | 4               | Hold       | 1x         |

### PCR Step 2 Master Mix

| Reagents (NEB #M0491, Thermo #BP28191) | Stock Concentration | Volume 1x reaction |
|----------------------------------------|---------------------|--------------------|
| Molecular Grade Water                  | NA                  | 11.75 uL           |
| Q5 Reaction Buffer                     | 5x                  | 5 uL               |

|                          |           |                                                |
|--------------------------|-----------|------------------------------------------------|
| <b>dNTPs</b>             | 10 mM     | 0.5 uL                                         |
| <b>Barcoded Primer F</b> | 10 mM     | 1.25 uL                                        |
| <b>Barcoded Primer R</b> | 10 mM     | 1.25 uL                                        |
| <b>Q5 Polymerase</b>     | 2000 U/mL | 0.25 uL                                        |
| <b>Total</b>             |           | <b>20 uL</b>                                   |
|                          |           | +5 uL PCR step 1 product diluted 1:10 with MGW |

### PCR Step 2 Thermocycling Parameters

| <b>Cycle Step</b>    |              | <b>Temperature (C)</b> | <b>Time</b> | <b>No. Cycles</b> |
|----------------------|--------------|------------------------|-------------|-------------------|
| Initial Denaturation |              | 98                     | 30 seconds  | 1x                |
| Amplification        | Denaturation | 95                     | 10 seconds  | 6x                |
|                      | Annealing    | 59                     | 15 seconds  |                   |
|                      | Elongation   | 72                     | 20 seconds  |                   |
| Final Elongation     |              | 72                     | 2 minutes   | 1x                |
| Hold                 |              | 4                      | Hold        | 1x                |
